# Supplementary material
Source: HighWire-hosted journal article supplement (https://molpharm.aspetjournals.org/highwire/filestream/86146/field_highwire_adjunct_files/0/173R1_Supp_PDF.pdf)

# **Molecular Pharmacology**

## **Supplemental Information**

### **CRISPR/Cas9 Genome Editing of the Human Topoisomerase II $\alpha$ Intron-19 5' Splice Site Circumvents Etoposide Resistance in Human Leukemia K562 Cells**

Victor A. Hernandez, Jessika Carvajal-Moreno, Jonathan L. Papa, Nicholas Shkolnikov, Junan Li, Hatice Gulcin Ozer, Jack C. Yalowich, and Terry S. Elton

Supplemental Table 1: Sequences of primers, single strand oligonucleotides, and qPCR hybridization probes utilized in this study

| Primer/Oligonucleotide Name                                                    | Primer Orientation | Primer/Oligonucleotide                                                                                                                                                                                                       | Annealing Region/ Function                        |
|--------------------------------------------------------------------------------|--------------------|------------------------------------------------------------------------------------------------------------------------------------------------------------------------------------------------------------------------------|---------------------------------------------------|
| Infusion Cloning TOP2α E19 For                                                 | Sense              | 5'-CCCAAGCTGGCTAGCGTCAG<br>AGAAAGTTTTGTTACT-3'                                                                                                                                                                               | Top2α E19                                         |
| Infusion Cloning TOP2α E20 Rev                                                 | Antisense          | 5'-CCCTCTAGACTCGAGCTGA<br>GCATTGTAAGATGTATCG-3'                                                                                                                                                                              | Top2α E20                                         |
| TOP2α E19/I19 Consensus 5' SS Mutation                                         | Sense              | 5'-CAGGTAAGTACACAATCCATGTTTCC-3'                                                                                                                                                                                             | TOP2α minigene E19/I19 5' SS                      |
| TOP2α E19 Inverse PCR Rev                                                      | Antisense          | 5'-ACCATGATGATAAGAAGACATTTTCAGC-3'                                                                                                                                                                                           | TOP2α minigene E19                                |
| T7 For                                                                         | Sense              | 5'-CGAAATTAATACGACTACTATAGG-3'                                                                                                                                                                                               | TOP2α I19                                         |
| Minigene TOP2α I19 Rev                                                         | Antisense          | 5'-CAGACTTATGAATATCCCTGCAGG-3'                                                                                                                                                                                               | TOP2α I19                                         |
| Minigene TOP2α Ex 20 Rev                                                       | Antisense          | 5'-GCAAGAGGTTTAGATTATTGCTACC-3'                                                                                                                                                                                              | TOP2α E20                                         |
| GCD HPRT1 For                                                                  | Sense              | 5'-AGAGGAGGGCCTTACTAATTAC-3'                                                                                                                                                                                                 | HPRT1 I2                                          |
| GCD HPRT1 Rev                                                                  | Antisense          | 5'-CATGCATAGCCAGTGCTTGAG-3'                                                                                                                                                                                                  | HPRT1 I2                                          |
| GCD TOP2α E18 For                                                              | Sense              | 5'-GATCTATCCCTTCTATGGTGG-3'                                                                                                                                                                                                  | TOP2α E18                                         |
| GCD TOP2α I19 Rev                                                              | Antisense          | 5'-CAGAAATCAAAGGGCAAGCAG-3'                                                                                                                                                                                                  | TOP2α I19                                         |
| HPRT1 sgRNA                                                                    | Sense              | 5'-GCAUUUCUCAGUCCUAAACA-3' + Scaffold                                                                                                                                                                                        | gRNA/Cas9 mediated DSB in HPRT1 I2                |
| TOP2α crRNA #1 (gRNA-1)                                                        | Sense              | 5'-GTCTTCTTATCATCATGGTG-3' + Scaffold                                                                                                                                                                                        | gRNA/Cas9 mediated DSB in TOP2α E19               |
| TOP2α crRNA #2 (gRNA-2)                                                        | Sense              | 5'-GAAATGTCTTCTTATCATCA-3' + Scaffold                                                                                                                                                                                        | gRNA/Cas9 mediated DSB in TOP2α E19               |
| TOP2α crRNA #3 (gRNA-3)                                                        | Antisense          | 5'-TATAATGCTTTCTGGAAACA-3' + Scaffold                                                                                                                                                                                        | gRNA/Cas9 mediated DSB in TOP2α I19               |
| Enhanced E19/I19 5' SS/No PAM-2                                                | Antisense          | 5'-GAGCTTATACTTTACCAAATCTGTTTTGAGA<br>ATGACTCTGCAGGGATTTCTGATATAATGCTTT<br>CTGGAACATGGATTGTGTA <del>CTT</del> ACTTACCTCAGCA<br>TGATGATAGAAGACATTTTCAGCCACTGATCCA<br>GCTAATTGGGCAACCTTTACTTCTCGCTTGCA<br>TTCCGTTTGAAGCAAGT-3' | HDR repair template of the TOP2α E19/I19 boundary |
| Custom Wild type TOP2α E19/I19 boundary Taqman qPCR probe                      | Sense              | 5'-TCATGGTGAGGTAAACACACAATCC-3'                                                                                                                                                                                              | Wild type TOP2α E19/I19 boundary                  |
| Wild type TOP2α E19/E20 boundary Taqman qPCR probe (Assay ID Hs01032135_m1)    | Sense              | 5'-TCATGGTGAGATGTCCTAATGATG-3'                                                                                                                                                                                               | Wildtype TOP2α E19/E20 boundary                   |
| Custom TOP2α E19/I19 5' SS edited (-PAM and optimized 5' SS) qPCR Taqman probe | Sense              | 5'-TCATG <u>CT</u> GAGGTAAG <u>T</u> ACACAATCC-3'                                                                                                                                                                            | CRISPR edited TOP2α E19/I19 boundary              |
| Custom TOP2α E19/E20 edited boundary qPCR Taqman probe                         | Sense              | 5'-TCATG <u>CT</u> GAGATGTCCTAATGATG-3'                                                                                                                                                                                      | CRISPR edited TOP2α E19/E20 boundary              |

**Supplemental Table 2: Cell line growth characteristics and etoposide-induced growth inhibition**

| Cell Line     | Doubling Time (hours) <sup>a</sup> | Etoposide IC <sub>50</sub> (μM) <sup>b</sup> | Relative Resistance <sup>d</sup> |
|---------------|------------------------------------|----------------------------------------------|----------------------------------|
| K562          | 18.7 ± 0.5 (7) <sup>c</sup>        | 0.19 ± 0.04 (8) <sup>c</sup>                 | ---                              |
| K/VP.5        | 19.9 ± 0.7 (7)                     | 2.65 ± 0.48 (16)                             | 13.9                             |
| K/VP.5/edit-1 | 20.1 ± 0.8 (7)                     | 1.60 ± 0.24 (7)                              | 8.4                              |
| K/VP.5/edit-2 | 20.0 ± 0.8 (7)                     | 0.59 ± 0.09 (6)                              | 3.1                              |
| K/VP.5/edit-3 | 19.9 ± 0.9 (7)                     | 0.08 ± 0.01 (14)                             | 0.4                              |

<sup>a</sup>Calculated from log-linear regression plots over 3-4 days of growth

<sup>b</sup>Fifty percent inhibitory concentration (IC<sub>50</sub>) in a 48 hour growth inhibition assay.

<sup>c</sup>Mean ± S.D.; numbers in parentheses, number of independent experiments performed on different days.

<sup>d</sup>IC<sub>50</sub> of K/VP.5 cells and gene-edited clones divided by that of the parental K562 cell line.

### Supplemental Figure Legends

**Supplemental Fig. 1.** TOP2 $\alpha$ /170 and TOP2 $\alpha$ /90 protein levels in parental K562 cells, drug resistant K/VP.5 cells, and gene-edited clonal cell lines K/VP.5/edit-1, K/VP.5/edit-2, and K/VP.5/edit-3.

**Supplemental Fig. 2.** Growth inhibitory effects of etoposide in K562, K/VP.5 and gene-edited clonal cell lines. Log-phase cells were incubated for 48 hours with various concentrations of etoposide after which cells were counted on an electronic particle counter (model Z1 Coulter counter). The extent of growth beyond the starting concentration in drug-treated versus DMSO controls was expressed ultimately as percent inhibition. Shown are representative concentration-response (inhibitory) curves for each cell line tested with 50% inhibitory concentrations (IC-50-values) indicated. Compilation of replicate experiments performed on different days is shown in Supplemental Table 2.

**Supplemental Fig. 3.** Scatter plot of gene expression between gene-edited K/VP.5/edit-3 and K/VP.5 cells for 625 essential genes (denoted in blue) (Wang et al., 2019a) and the top 20 putative Cas9/g-RNA-2 off-target genes predicted by the CCTop algorithm (<https://cctop.cos.uni-heidelberg.de/>) (Stemmer et al., 2015) and expressed in K/VP.5/edit-3 and K/VP.5 cells. Dotted lines denote 2 fold-change in gene expression.

# Supplemental Fig. 1

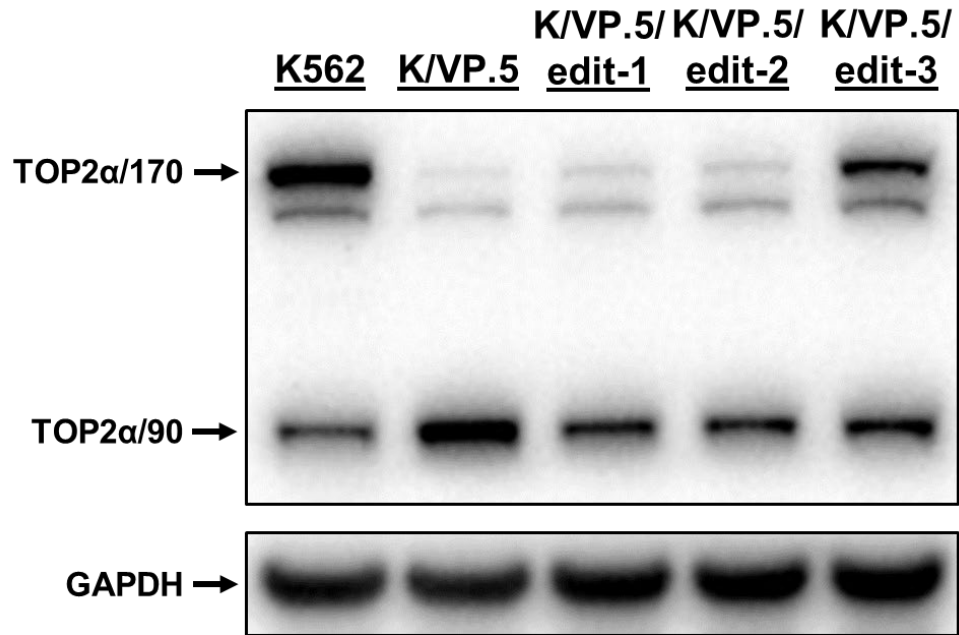

## Supplemental Fig. 2

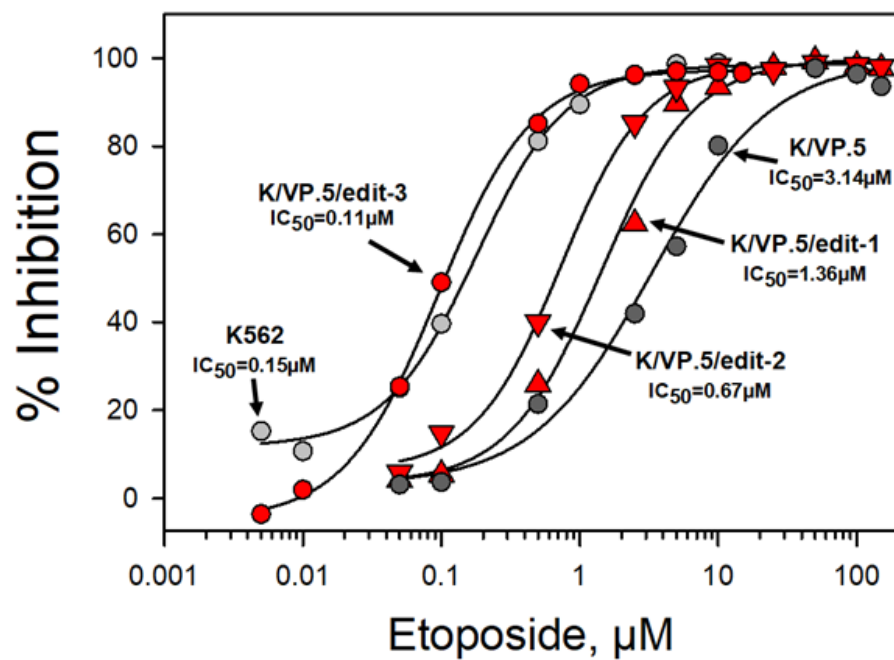

**Supplemental Fig. 3**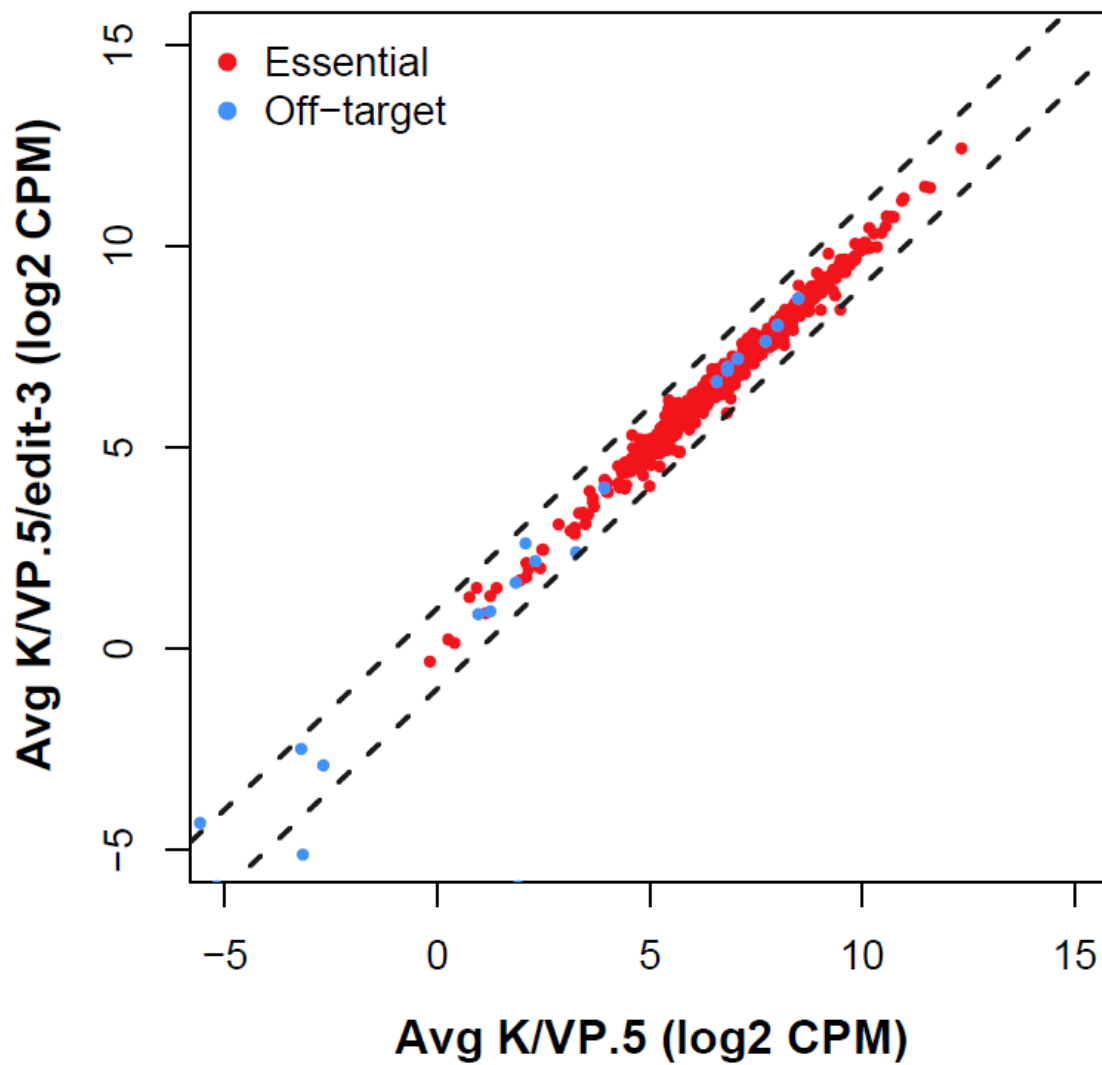

Supplement: 173R1_Supp_PDF.pdf [file 173R1_Supp_PDF.pdf]
